# Supplementary material for: Coevolution of DNA Uptake Sequences and Bacterial Proteomes
Source: PubMed Central journal article supplement — Genome Biol Evol. 2009 May 5;1:45–55. doi: 10.1093/gbe/evp005 (PMC2817400; doi:10.1093/gbe/evp005), 2009-05-05
Supplement: evp005_1.pdf [file evp005_1.pdf]

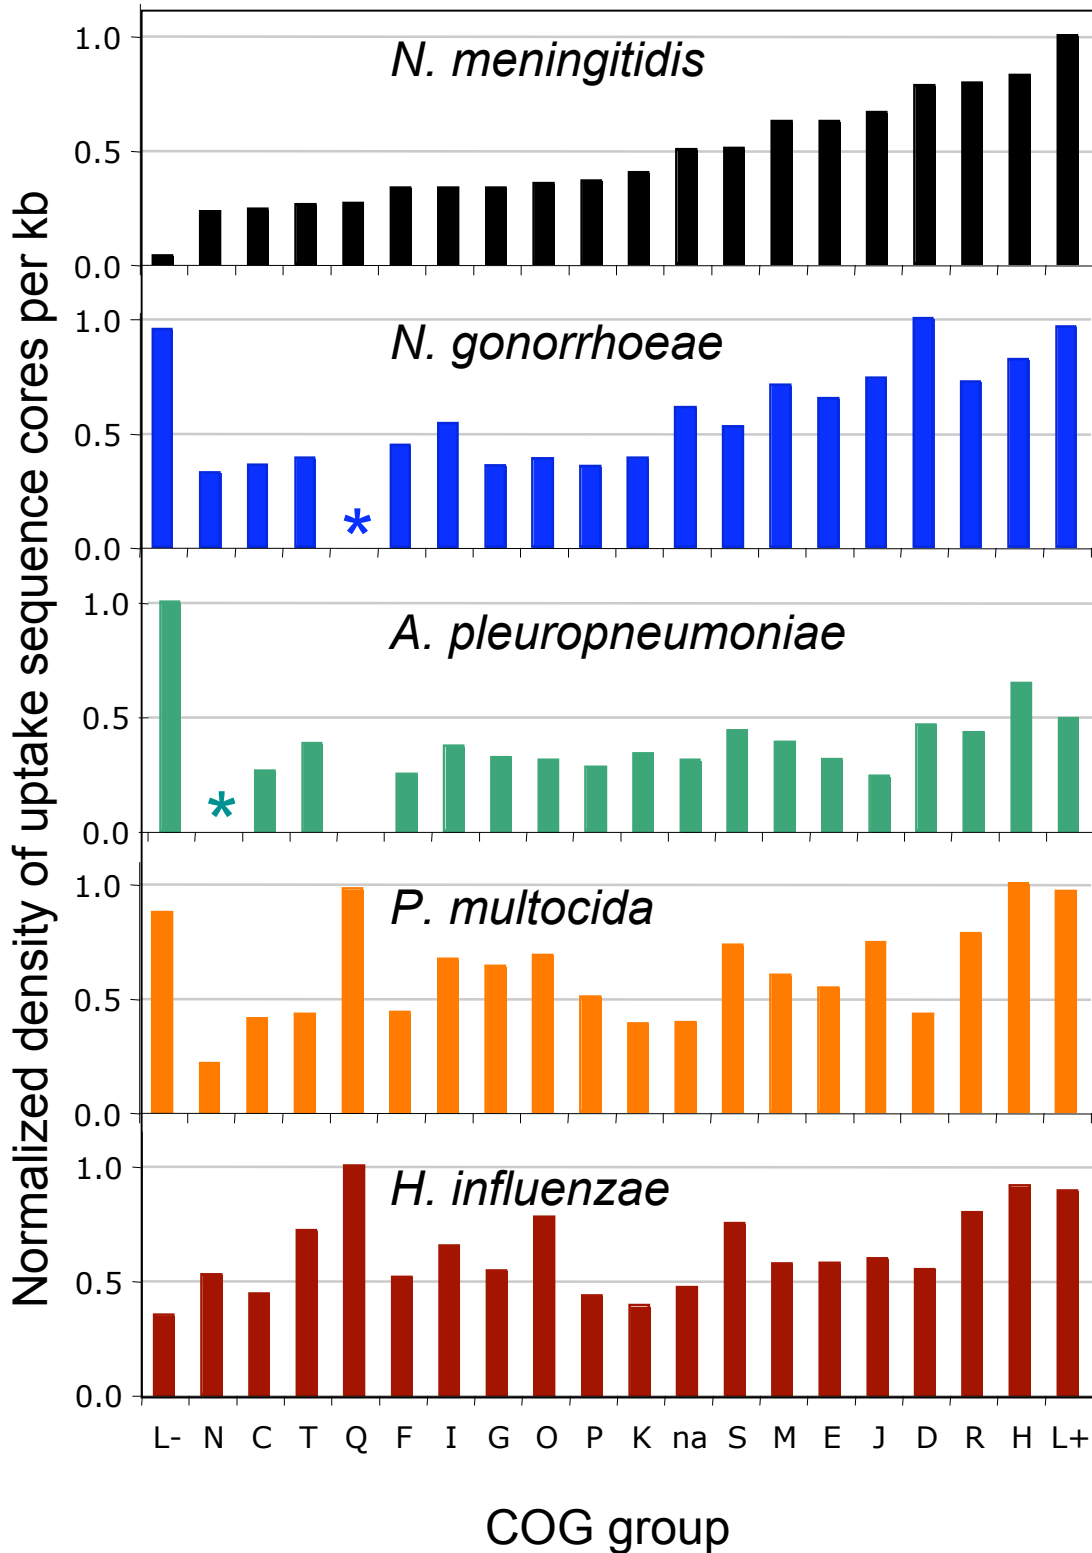

**Supplementary Figure 1. Uptake sequence density in COG groups of different species.** COG groups are ordered by their uptake sequence density in *N. meningitidis*.  
 \* no members of this COG were identified.

**Complete alignment**

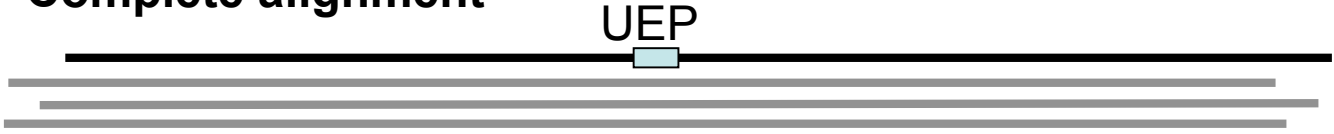

**Trimmed alignment (99 aa)**

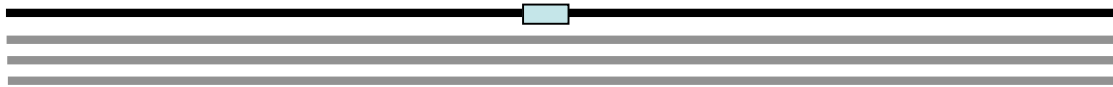

**9 aa segments (Fig. 6)**

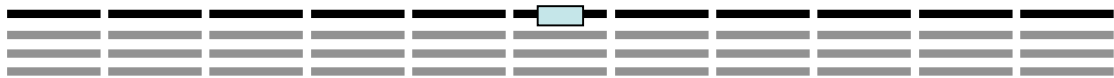

**3 aa segments (Fig. 7)**

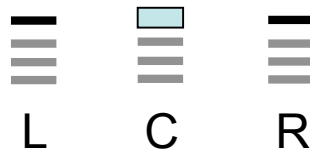

**Supplementary Figure 2.** Schematic diagram of the homolog analysis presented in Figures 5 and 6. The black lines represent a protein sequence from either *H. influenzae* or *N. meningitidis* centered on a US-encoded tripeptide, and the grey lines represent aligned homologous protein sequences from the corresponding standard genomes.
